# Supplementary material
Source: Elsevier journal article supplement (https://www.sciencedirect.com/science/article/pii/S0014256514001258)
Supplement: mmc1 [file S0014256514001258:mmc1.docx]

**Respuesta correcta d. Fiebre Botonosa Mediterránea**

La serología a *Ricketsia conorii* mediante inmunoflurescencia indirecta resultó positiva con título 1/1280, por lo que se estableción el diagnóstico de fiebre botonosa mediterránea. Se trató con doxiciclina (100 mg/12 horas, vía oral), con desaparición de la fiebre en pocos días, y resolución posterior de las lesiones cutáneas.

La Fiebre Botonosa Mediterránea es una enfermedad endémica en muchos países de la cuenca del mediterráneo. Es causada por la bacteria *Rickettsia conorii* y se transmite por la garrapata del perro *Rhipicephalus sanguineus*. Tras un periodo de incubación de entre uno y tres semanas, suele debutar de manera brusca con fiebre elevada, cefalea, poliartralgias, linfadenopatía regional y posterior aparición, a los 3-5 días, de una lesión dérmica consistente en una escara necrótica en el punto de inoculación (“mancha negra” o “tache noire”). El diagnóstico se basa en criterios clínicos y epidemiológicos y se confirma por datos serológicos e inmunohistológicos asi como el aislamiento de la bacteria en algunos casos. La doxiciclina, ciprofloxacino y cloranfenicol son algunos de los fármacos efectivos en su tratamiento.
